# Supplementary material
Source: Research Square preprint supplement (doi:10.21203/rs.3.rs-7823758/v1)
Supplement: Supplementary file 1 [file e1cab9cccc3549ede33521f2.docx]

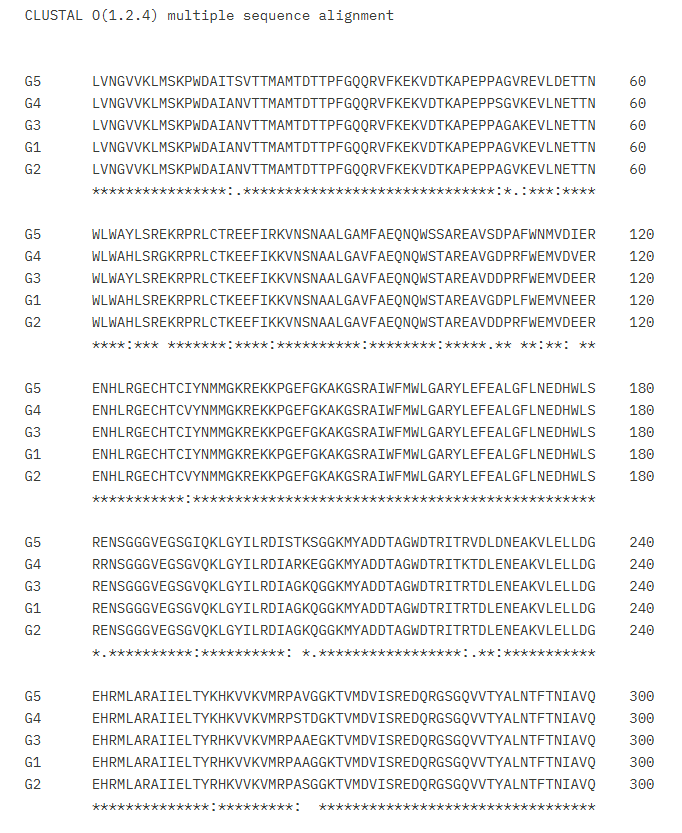


**S1. Multiple sequence alignment of RdRp Domain across the JEV genotype**

Cont.…
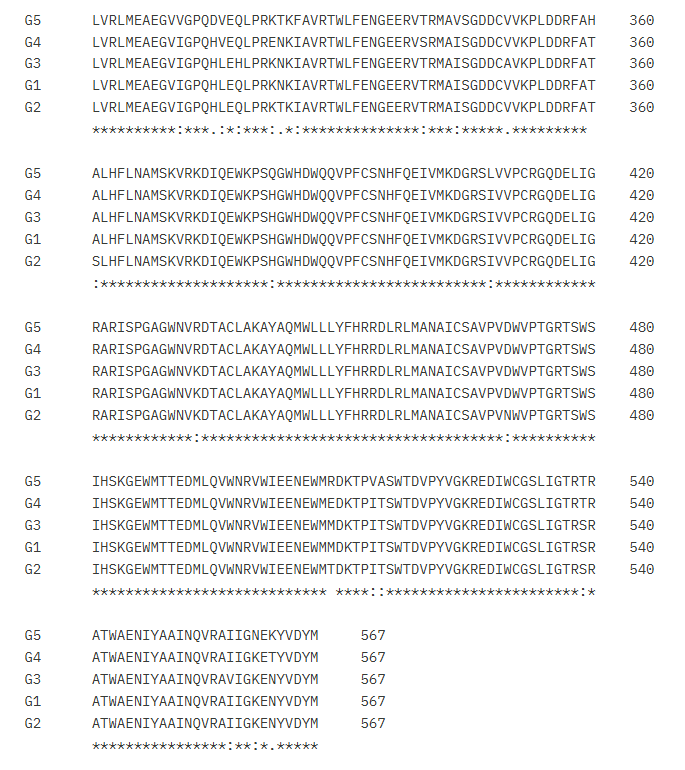


**S1. Multiple sequence alignment of the RdRp Domain across the JEV genotype**


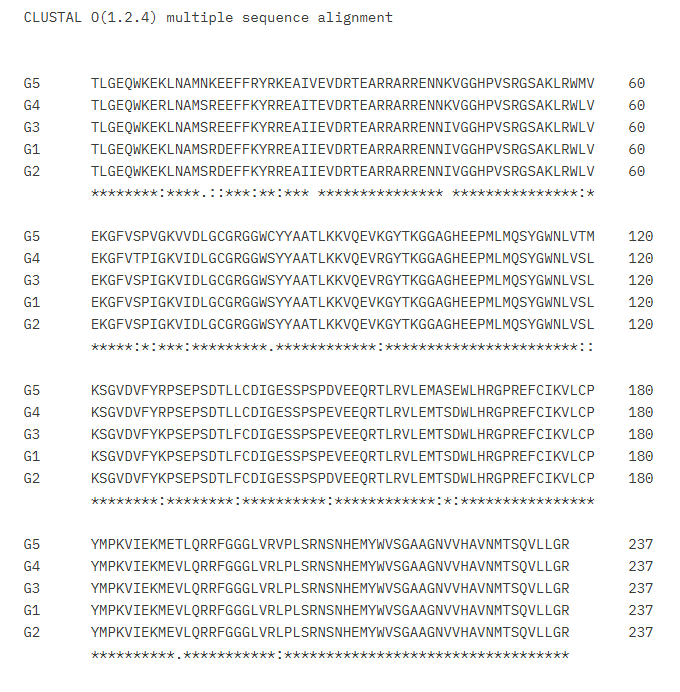


**S2. Multiple Sequence alignment of the MTase Domain across the JEV genotype**
